# Supplementary material for: Blockchain Operations in the Presence of Security Concerns
Source: Atypon-hosted journal article supplement (doi:10.1287/msom.2023.1197), 2023-02-27
Supplement: msom.2023.1197.sm1.pdf [file msom.2023.1197.sm1.pdf]

## EC.1. Proofs for Section 3

*Proof of Lemma 1* By Watson (1929) and Stirling's formula,

$$\frac{1}{2} \leq \sum_{k=0}^z \frac{z^k e^{-z}}{k!} \leq \frac{1}{2} + \frac{2z^z e^{-z}}{3z!} \leq \frac{1}{2} + \frac{2}{3\sqrt{2\pi z}}.$$

Since

$$0 < \sum_{k=z+1}^{\infty} \frac{(z/\beta)^k}{k!} \leq \sum_{k=z+1}^{\infty} \frac{(z/\beta)^{z+1}}{(z+1)!} \left( \frac{z/\beta}{z+2} \right)^{k-z-1} = \frac{(z/\beta)^{z+1}}{(z+1)!} \frac{1}{1 - \frac{z/\beta}{z+2}} \leq \frac{1}{1 - 1/\beta} \frac{1}{\sqrt{2\pi z}} (1/\beta)^z e^{z(1-2/\beta)},$$

we are able to obtain our bounds.

Since  $\bar{\gamma}(\beta, \bar{z}(\beta, \delta)) = \underline{\gamma}(\beta, \underline{z}(\beta, \delta)) = \delta$ ,

$$\left[ 1 + \frac{\frac{4}{3} + \frac{2}{1-1/\beta}}{\sqrt{2\pi \bar{z}(\beta, \delta)}} \right] \left[ \frac{1}{\beta} e^{(1-1/\beta)} \right]^{\bar{z}(\beta, \delta) - \underline{z}(\beta, \delta)} = 1.$$

Since  $0 < \frac{1}{\beta} e^{(1-1/\beta)} < 1$  and  $\bar{z}(\beta, \delta)$  is decreasing in  $\delta$  for  $\beta > 1$ ,  $\bar{z}(\beta, \delta) - \underline{z}(\beta, \delta)$  is increasing in  $\delta$ .  $\square$

## EC.2. Proofs for Section 4

*Proof of Proposition 1* We first claim that  $G^*(b)$  must be continuous for  $b > \underline{b}$  for a given  $p^*$ . Suppose that  $G^*(b+) > G^*(b-)$  at some  $b$ . Then, for  $\epsilon$  sufficiently small, the cost difference for bidding at  $b$  and  $b + \epsilon$  is

$$(1 - \delta)b + c(W(b - \epsilon | (p^* \Lambda, G^*), z)) - (1 - \delta)(b + \epsilon) - c(W(b + \epsilon | (p^* \Lambda, G^*), z)) > 0.$$

Thus, bidding at  $b + \epsilon$  is preferred to bidding at  $b$ , and hence  $G^*(\cdot)$  must be continuous.

Second, if  $\underline{b}$  is the lowest bid allowed, the lowest bid must be  $\underline{b}$  as it would otherwise cost users more to bid the lowest bid without lowering the queueing latency otherwise.  $\square$

*Proof of Theorem 1* By Proposition 1, the support of the equilibrium fee distribution  $G^*(\cdot)$  includes  $\underline{b}$  and  $G^*(\cdot)$  is continuous. Thus, (6) follows as the users' cost is the same for any bid  $b$  in the support, i.e.,  $(1 - \delta)\underline{b} + c\left(W_q(p^* \Lambda) + \frac{z}{\mu}\right) = (1 - \delta)b + c\left(W_q(p^* \Lambda(1 - G^*(b))) + \frac{z}{\mu}\right)$ . Since the equilibrium joining probability  $p^* \leq 1$ ,  $p^* = 1$  if the users' utility  $R(\delta, \underline{b}) - c\left(W_q(\Lambda) + \frac{z}{\mu}\right) \geq 0$ . Otherwise,  $p^*$  is given by  $c\left(W_q(p^* \Lambda) + \frac{z}{\mu}\right) = R(\delta, \underline{b})$  and users' utility is 0 in equilibrium. Thus, we have (5).

Since the highest possible bid is the smallest solution to  $\bar{G}^*(b) = 0$  or  $\underline{b} + \frac{c(W_q(p^*\Lambda) + \frac{z}{\mu}) - c(\frac{z+1}{\mu})}{1-\delta}$ , (9) holds as

$$\begin{aligned}
\Phi^*(z) &= (1-\delta) \left( p^*\Lambda \underline{b} + \int_{\underline{b}}^{\underline{b} + \frac{c(W_q(p^*\Lambda) + \frac{z}{\mu}) - c(\frac{z+1}{\mu})}{1-\delta}} p^*\Lambda \bar{G}^*(b) db \right) \\
&= (1-\delta) p^*\Lambda \underline{b} + \int_{c(\frac{1+z}{\mu})}^{c(W_q(p^*\Lambda) + \frac{z}{\mu})} W_q^{-1} \left( c^{-1}(s) - \frac{z}{\mu} \right) ds \\
&= (1-\delta) p^*\Lambda \underline{b} + \int_{1/\mu}^{W_q(p^*\Lambda)} W_q^{-1}(t) dc \left( t + \frac{z}{\mu} \right) \\
&= (1-\delta) p^*\Lambda \underline{b} + \int_0^{p^*\Lambda} \tilde{\lambda} dc \left( W_q(\tilde{\lambda}) + \frac{z}{\mu} \right) \tag{EC.1} \\
&= (1-\delta) p^*\Lambda \underline{b} + p^*\Lambda c \left( W_q(p^*\Lambda) + \frac{z}{\mu} \right) - \int_0^{p^*\Lambda} c \left( W_q(\tilde{\lambda}) + \frac{z}{\mu} \right) d\tilde{\lambda} \\
&= p^*\Lambda \min \left\{ R(\delta, \underline{b}), (1-\delta)\underline{b} + c \left( W_q(\Lambda) + \frac{z}{\mu} \right) \right\} - \int_0^{p^*\Lambda} c \left( W_q(\tilde{\lambda}) + \frac{z}{\mu} \right) d\tilde{\lambda}
\end{aligned}$$

and the expected utility of the users are given by (7).  $\square$

PROPOSITION EC.1. *The equilibrium solution given in Theorem 1 has the following properties.*

1.  $p^*(z)$  decreases in  $z$ , from 1 if  $\frac{1}{\Lambda} W_q^{-1}(c^{-1}(R(\delta, \underline{b}))) > 1$ .
2.  $G^*(\cdot|z)$  stochastically increases while  $p^*(z) = 1$  and then decreases as  $z$  increases;
3. For a given  $z$ ,  $G^*(b|z)$  is strictly increasing convex in  $b$  before it reaches 1.

*Proof of Proposition EC.1* The first statement is clear. To establish the remaining statements, we first show that  $W_q(\tilde{\lambda})$  is increasing convex in  $\tilde{\lambda}$ . By (3), we can express the queueing latency as a function of  $\theta$  as  $W_q(\theta) = \frac{1}{\mu[1-(1+K)\theta^K + K\theta^{K+1}]}$ . Taking the derivate of  $W_q$  yields that

$$\frac{dW_q(\theta)}{d\tilde{\lambda}} = W_q'(\theta) \frac{d\theta}{d\tilde{\lambda}} = \frac{K(K+1)}{\mu^2} \frac{(1-\theta)^3 \theta^{K-1}}{[1-(1+K)\theta^K + K\theta^{K+1}]^3}$$

and  $\theta$  is increasing in  $\tilde{\lambda}$ ,  $W_q$  is increasing in  $\tilde{\lambda}$  and it suffices to show that  $\frac{(1-\theta)^3 \theta^{K-1}}{\eta^3(\theta)}$ , where  $\eta(\theta) = 1 - (1+K)\theta^K + K\theta^{K+1}$ , is increasing in  $\theta$ . Since

$$\frac{d}{d\theta} \left( \frac{(1-\theta)^3 \theta^{K-1}}{\eta^3(\theta)} \right) = \frac{(1-\theta)^2 \theta^{K-2}}{\eta^4(\theta)} [(K-1 - (K+2)\theta)\eta(\theta) - 3\eta'(\theta)(1-\theta)] \triangleq \frac{(1-\theta)^2 \theta^{K-2}}{\eta^4(\theta)} h(\theta),$$

and  $h(\theta) > 0$  when  $K \leq 3$ , it suffices to show that  $h(\theta) > 0$  for  $\theta \in (0, 1)$  and hence  $h'(\theta) < 0$  given that  $h(1) = 0$  for  $K \geq 4$ . We show this by establishing that  $h'(\theta)$  has a unique global maximum  $\theta = 1$  in  $(0, 1]$  at  $h'(1) = 0$ . Taking the derivatives, we obtain:

$$\begin{aligned}
h'(\theta) &= -(K+2) + K(K+1)(2K+1)\theta^{K-1} + (K+1)(-4K^2 - 4K + 2)\theta^K + K(K+2)(2K+1)\theta^{K+1}, \\
h''(\theta) &= K(K+1)\theta^{K-2}[(K-1)(2K+1) + (-4K^2 - 4K + 2)\theta + (K+2)(2K+1)\theta^2].
\end{aligned}$$

It can be easily shown that the term in “[ ]” in  $h''(\theta)$  is quadratic with exactly two roots  $\theta_1 < \theta_2$  in  $(0, 1)$ . Thus,  $h'(\theta)$  must achieve its global maxima at either  $\theta_1$  or 1. Since  $\theta_1$  is a root of  $h''(\theta) = 0$ , it satisfies  $(K-1)(2K+1) + (-4K^2 - 4K + 2)\theta_1 = -(K+2)(2K+1)\theta_1^2$  and  $h'(\theta_1)$  can be reduced to

$$h'(\theta_1) = -(K+2) + 2K(2K+1)\theta_1^{K-1} - (4K^2 + 4K - 2)\theta_1^K,$$

which is bounded from above by  $\left\{ \frac{4K+2}{K+2} \left[ \frac{(2K+1)(K-1)}{2K^2+2K-1} \right]^{K-1} - 1 \right\} (K+2)$ . Applying  $\ln(1-x) < -x - \frac{x^2}{2}$ , we have:

$$\begin{aligned} & \frac{d}{dK} \ln \left[ \frac{4K+2}{K+2} \left( \frac{(2K+1)(K-1)}{2K^2+2K-1} \right)^{K-1} \right] \\ &= \frac{6K^3 + 18K^2 + 9K + 3 + (K+2)(2K+1)(2K^2+2K-1) \ln\left(1 - \frac{3K}{2K^2+2K-1}\right)}{(K+2)(2K+1)(2K^2+2K-1)} \\ &< \frac{6K^3 + 18K^2 + 9K + 3 + (K+2)(2K+1)(-3K - \frac{9K^2}{2K^2+2K-1})}{(K+2)(2K+1)(2K^2+2K-1)} \\ &= \frac{-3(4K^4 + 11K^3 + 3K^2 - K + 1)}{(K+2)(2K+1)(2K^2+2K-1)^2} < 0 \end{aligned}$$

for  $K \geq 1$ . Since  $\frac{4K+2}{K+2} \left( \frac{(2K+1)(K-1)}{2K^2+2K-1} \right)^{K-1} \Big|_{K=4} < 1$ ,  $h'(\theta) < 0$   $\theta \in [0, 1]$  for  $K \geq 4$ .

Since  $W_q(\cdot)$  and  $c(\cdot)$  are both strictly increasing and convex, or equivalently  $W_q^{-1}(\cdot)$  and  $c^{-1}(\cdot)$  are increasing concave,  $G^*(b|z)$  is strictly increasing convex in  $b$ , i.e., the third statement follows. Furthermore, when  $p^*(z) = 1$ ,  $c\left(W_q((\Lambda) + \frac{z}{\mu})\right) - c\left(W_q((1 - G^*(b|z))\Lambda) + \frac{z}{\mu}\right) = (1 - \delta)(b - \underline{b})$ , implying that  $G^*(\cdot|z)$  stochastically increases in  $z$ . When  $p^*(z) < 1$ ,  $G^*(b|z) = 1 - \frac{W_q^{-1}(c^{-1}(R(\delta, b) - \frac{z}{\mu}))}{W_q^{-1}(c^{-1}(R(\delta, \underline{b}) - \frac{z}{\mu}))}$  is increasing in  $z$ , i.e.,  $G^*(\cdot|z)$  stochastically decreases in  $z$ . Thus, the second statement holds.  $\square$

*Proof of Proposition 2* When  $p^*(z) = 1$ ,

$$\begin{aligned} \Phi^*(z) &= \Lambda \left[ (1 - \delta)\underline{b} + c\left(W_q(\Lambda) + \frac{z}{\mu}\right) \right] - \int_0^\Lambda c\left(W_q(\tilde{\lambda}) + \frac{z}{\mu}\right) d\tilde{\lambda} \\ &= \Lambda(1 - \delta)\underline{b} + \int_0^\Lambda \left[ c\left(W_q(\Lambda) + \frac{z}{\mu}\right) - c\left(W_q(\tilde{\lambda}) + \frac{z}{\mu}\right) \right] d\tilde{\lambda}, \end{aligned}$$

which increases in  $z$  due to the convexity of  $c(\cdot)$ . When  $p^*(z) < 1$ , we first establish the log-concavity of  $\Phi^*(z)$  for piece-wise linear  $c(\cdot)$  functions. That is, for  $0 = s_0 < s_1 < \dots, k_1 < k_2 < \dots$  and  $w \in [s_{i-1}, s_i]$ ,

$$c(w) = d_0 + \sum_{j=0}^{i-1} k_j(s_j - s_{j-1}) + k_i(w - s_{i-1}). \quad (\text{EC.2})$$

Suppose that  $W_q(0) + \frac{z}{\mu} \in [s_{m-1}, s_m)$  and  $W_q(p^*(z)\Lambda) + \frac{z}{\mu} \in [s_{n-1}, s_n)$ . By (EC.1),

$$\begin{aligned} \Phi^*(z) &= (1 - \delta)\underline{b}p^*(z)\Lambda + \int_0^{p^*(z)\Lambda} \tilde{\lambda} dc\left(W_q(\tilde{\lambda}) + \frac{z}{\mu}\right) \\ &= (1 - \delta)\underline{b}p^*(z)\Lambda + \sum_{j=m}^{n-1} (k_{j+1} - k_j) \int_{s_j - \frac{z}{\mu}}^{W_q(p^*(z)\Lambda)} W_q^{-1}(\tilde{\lambda}) d\tilde{\lambda} + k_m \int_0^{W_q(p^*(z)\Lambda)} W_q^{-1}(\tilde{\lambda}) d\tilde{\lambda} \end{aligned}$$

and is differentiable even if  $W_q(0) + \frac{z}{\mu} = s_{m-1}$  as

$$\lim_{\epsilon \downarrow 0} \frac{\Phi^*(z + \epsilon) - \Phi^*(z)}{\epsilon} - \lim_{\epsilon \downarrow 0} \frac{\Phi^*(z) - \Phi^*(z - \epsilon)}{\epsilon} = \frac{-(k_m - k_{m-1})W_q^{-1}\left(s_{m-1} - \frac{z}{\mu}\right)}{\mu} = 0.$$

Since

$$\begin{aligned} \frac{d \ln [\Phi^*(z)]}{dz} &= \frac{\Phi^{*'}(z)}{\Phi^*(z)} = \frac{-(1 - \delta)\underline{b}}{\mu W_q'(p^*(z)\Lambda)\Phi^*(z)} + \frac{-k_m p^*(z)\Lambda}{\mu \Phi^*(z)} \\ &\quad + \sum_{j=m}^{n-1} (k_{j+1} - k_j) \frac{W_q^{-1}\left(s_j - \frac{z}{\mu}\right) - W_q^{-1}\left(c^{-1}(R - \underline{b}) - \frac{z}{\mu}\right)}{\mu \Phi^*(z)} \leq 0 \end{aligned}$$

by applying  $p^*(z) = -\frac{1}{\Lambda \mu W_q'(p^*(z)\Lambda)}$  from (5),  $\Phi^*(z)$  decreases in  $z$ . Furthermore, both the first term and the summands in the third term are all decreasing in  $z$ , by the concavity of  $W_q^{-1}(\cdot)$ . Note that  $\frac{\Phi^*(z)}{p^*(z)\Lambda}$  is the expected fee paid by a user who joins the system and  $G^*(\cdot|z)$  is the fee distribution in equilibrium. Since  $G^*(\cdot|z)$  is stochastically decreasing in  $z$ , the second term is also decreasing in  $z$ . Thus,  $\ln [\Phi^*(z)]$  is concave and, by the Weierstrass' approximation, remains concave for general increasing convex  $c(\cdot)$  functions.  $\square$

*Proof of Proposition 3* When  $p^*(z) = 1$ ,  $\underline{\gamma}(\beta^*(z), z)$  is decreasing. Thus, it suffices to show that the function is quasi-convex when  $p^*(z) < 1$ , or equivalently, that  $\ln((z^*)^{-1}(z)) - \ln(\beta^*(z))$  is quasi-convex. Since  $-\ln(\beta^*(z))$  is convex by Proposition 2 and

$$\left[ \ln((z^*)^{-1}(z)) \right]' = \frac{(\beta(\log(\beta) - 1) + 1)^2}{\beta(\beta - 1)} \quad (\text{EC.3})$$

decreases in  $\beta$  and hence increases in  $z$ ,  $\ln((z^*)^{-1}(z)) - \ln(\beta^*(z))$  is quasi-convex.  $\square$

*Proof of Proposition 4* As shown in the proof of Proposition 3,  $\ln((z^*)^{-1}(z))$  is increasing convex while  $\ln(\beta^*(z))$  is increasing concave. Thus,  $\{z^n : n = 0, 1, \dots\}$  is a decreasing sequence when  $z^1 \in (z_1^*, z_2^*)$  and an increasing sequence when  $z^1 < z_1^*$  or  $z^1 > z_2^*$ , and hence must converge in both cases. The sequence can only converge to  $z_1^*$  when  $z^1 \in (z_1^*, z_2^*)$  and to  $\infty$  when  $z^1 > z_2^*$ . When  $z^1 < z_1^*$ , by a simple induction,  $\beta^n = \beta^*(z^n) > \beta_1^*$  by the monotonicity of  $\beta^*(z)$ . Hence,  $z^n < z_1^*$  for all  $n$  and the sequence converges to  $z_1^*$ .  $\square$

### EC.3. Proofs for Section 5

*Proof of Lemma 2* Note that

$$\begin{aligned} & \beta^* \left( z \left| \frac{\eta}{K_m}, K_m, \frac{1}{1-\delta} \left[ R(\delta, 0) - c \left( W_q \left( \Lambda \left| \frac{\eta}{K_m}, K_m \right) + \frac{zK_m}{\eta} \right) \right]^+ \right) \right) \\ &= \alpha \int_0^{\min\{\Lambda, W_q^{-1}(c^{-1}(R(\delta, 0)) - \frac{zK_m}{\eta} | \frac{\eta}{K_m}, K_m)\}} \left[ R(\delta, 0) - c \left( W_q \left( \lambda \left| \frac{\eta}{K_m}, K_m \right) + \frac{zK_m}{\eta} \right) \right] d\lambda. \end{aligned}$$

$\int_0^{W_q^{-1}(c^{-1}(R(\delta, 0)) - \frac{zK_m}{\eta} | \frac{\eta}{K_m}, K_m)} \left[ R(\delta, 0) - c \left( W_q \left( \lambda \left| \frac{\eta}{K_m}, K_m \right) + \frac{zK_m}{\eta} \right) \right] d\lambda$  is the total fee as if  $\Lambda = \infty$  and is decreasing and log-concave in  $z$  by Proposition 2. Since  $\int_0^\Lambda \left[ R(\delta, 0) - c \left( W_q \left( \lambda \left| \frac{\eta}{K_m}, K_m \right) + \frac{zK_m}{\eta} \right) \right] d\lambda$  is also decreasing and log-concave in  $z$ , so is  $\beta^* \left( z \left| \frac{\eta}{K_m}, K_m, \frac{1}{1-\delta} \left[ R(\delta, 0) - c \left( W_q \left( \Lambda \left| \frac{\eta}{K_m}, K_m \right) + \frac{zK_m}{\eta} \right) \right]^+ \right) \right)$ , and hence, the left-hand side of (13) is quasi-convex in  $z$  by a similar argument as in the proof of Proposition 3. Thus, to establish Lemma 2, it suffices to show that, for a given  $z$ , there exists  $(\mu, K, \underline{b})$  such that  $(z, \mu, K, \underline{b})$  is feasible if and only if

$$\underline{\gamma} \left( \beta^* \left( z \left| \frac{\eta}{K_m}, K_m, \frac{1}{1-\delta} \left[ R(\delta, 0) - c \left( W_q \left( \Lambda \left| \frac{\eta}{K_m}, K_m \right) + \frac{zK_m}{\eta} \right) \right]^+ \right) \right), z \right) \leq \delta. \quad (\text{EC.4})$$

To show the “if” part, assume that (EC.4) holds. Since  $\lim_{\underline{b} \rightarrow +\infty} \underline{\gamma} \left( \beta^* \left( z \left| \frac{\eta}{K_m}, K_m, \underline{b} \right) \right), z \right) = 1$  and  $\underline{\gamma} \left( \beta^* \left( z \left| \frac{\eta}{K_m}, K_m, \underline{b} \right) \right), z \right)$  is continuous in  $\underline{b}$ , there exists  $\underline{b} > \frac{1}{1-\delta} \left[ R(\delta, 0) - c \left( W_q \left( \Lambda \left| \frac{\eta}{K_m}, K_m \right) + \frac{zK_m}{\eta} \right) \right]^+$  such that  $\underline{\gamma} \left( \beta^* \left( z \left| \frac{\eta}{K_m}, K_m, \underline{b} \right) \right), z \right) = \delta$ , i.e.,  $(z, \frac{\eta}{K_m}, K_m, \underline{b})$  is a feasible solution. To show the “only if” part, assume that  $(z, \mu, K, \underline{b})$  is a feasible solution. Then,  $\underline{\gamma}(z | \mu, K, \underline{b}) = \delta$  and

$$\begin{aligned} \beta^*(z | \mu, K, \underline{b}) &\leq \beta^* \left( z \left| \mu, K, \frac{1}{1-\delta} \left[ R(\delta, 0) + c \left( W_q(\Lambda | \mu, K) + \frac{z}{\mu} \right) \right]^+ \right) \right) \\ &\leq \beta^* \left( z \left| \frac{\eta}{K}, K, \frac{1}{1-\delta} \left[ R(\delta, 0) + c \left( W_q(\Lambda | \mu, K) + \frac{z}{\mu} \right) \right]^+ \right) \right) \\ &\leq \beta^* \left( z \left| \frac{\eta}{K_m}, K_m, \frac{1}{1-\delta} \left[ R(\delta, 0) + c \left( W_q \left( \Lambda \left| \frac{\eta}{K_m}, K_m \right) + \frac{zK_m}{\eta} \right) \right]^+ \right) \right), \end{aligned}$$

where the first inequality follows as

$$\frac{\partial \beta^*(z | \mu, K, \underline{b})}{\partial \underline{b}} = \begin{cases} \alpha \Lambda > 0, & \text{if } \underline{b} < \frac{1}{1-\delta} \left[ R(\delta, 0) - c \left( W_q(\Lambda | \mu, K) + \frac{z}{\mu} \right) \right]^+, \\ \alpha \underline{b} \frac{\partial \lambda^*(z | \mu, K, \underline{b})}{\partial \underline{b}} < 0, & \text{if } \underline{b} > \frac{1}{1-\delta} \left[ R(\delta, 0) - c \left( W_q(\Lambda | \mu, K) + \frac{z}{\mu} \right) \right]^+, \end{cases} \quad (\text{EC.5})$$

i.e.,  $\beta^*(z | \mu, K, \underline{b})$  is maximized at  $\underline{b} = \frac{1}{1-\delta} \left[ R(\delta, 0) - c \left( W_q(\Lambda | \mu, K) + \frac{z}{\mu} \right) \right]^+$  for any fixed  $(z, \mu, K)$ , the second inequality follows as

$$\begin{aligned} & \beta^* \left( z \left| \mu, K, \frac{1}{1-\delta} \left[ R(\delta, 0) - c \left( W_q(\Lambda | \mu, K) + \frac{z}{\mu} \right) \right]^+ \right) \right) \\ &= \int_0^{\lambda^*(z | \mu, K, \frac{1}{1-\delta} [R(\delta, 0) - c(W_q(\Lambda | \mu, K) + \frac{z}{\mu})]^+)} \left[ R(\delta, 0) - c \left( W_q(\tilde{\lambda} | \mu, K) + \frac{z}{\mu} \right) \right] d\tilde{\lambda}, \end{aligned}$$

which increases in  $\mu$  since both the upper limit and integrand are non-negative and increasing in  $\mu$ , and the last inequality follows if  $W_q(\Lambda|\frac{\eta}{K}, K)$  is increasing in  $K$ , which is shown below. Thus,

$$\underline{\gamma} \left( \beta^* \left( z \left| \frac{\eta}{K_m}, K_m, \frac{1}{1-\delta} \left[ R(\delta, 0) - c \left( W_q \left( \Lambda \left| \frac{\eta}{K_m}, K_m \right) + \frac{zK_m}{\eta} \right) \right]^+ \right), z \right) \leq \underline{\gamma}(\beta^*(z|\mu, K, \underline{b}), z) = \delta,$$

i.e., (EC.4) holds.

It remains to show that  $W_q(\Lambda|\frac{\eta}{K}, K)$  is increasing in  $K$ . Letting  $\theta \in (0, 1)$  be the unique solution to  $\frac{\theta - \theta^{K+1}}{1-\theta} = K\frac{\Lambda}{\eta}$ , we have  $W_q(\Lambda|\frac{\eta}{K}, K) = \frac{K}{\eta[1-(1+K)\theta^K + K\theta^{K+1}]} = \frac{\theta}{(1-\theta)[\Lambda(1+K) - (\eta + \Lambda K)\theta]}$ . It is clear that  $W_q(\Lambda|\eta, 1) < W_q(\Lambda|\frac{\eta}{2}, 2)$  and it suffices to show that  $\frac{d}{dK}W_q(\Lambda|\frac{\eta}{K}, K) > 0$  for  $K \in [2, \infty)$ , which is equivalent to

$$\frac{(\eta + 2\Lambda K + \Lambda)\theta}{\Lambda(1+K) - (\eta + \Lambda K)\theta^2} > \frac{-\eta\theta^{K+1}\ln(\theta)}{\Lambda K(1-\theta)} + 1 - \frac{1}{K} \quad (\text{EC.6})$$

as  $\frac{d\theta}{dK} = \frac{\theta[\Lambda(1-\theta) + \eta\theta^{K+1}\ln(\theta)]}{K[\Lambda(1+K) - (\eta + \Lambda K)\theta]}$ . Since  $1 + \frac{\Lambda}{\eta}K - \frac{\Lambda K}{\theta\eta} = \theta^K \in (0, \frac{\Lambda}{\eta})$ ,  $\theta \in (\frac{\Lambda K}{\eta + \Lambda K}, \frac{\Lambda K}{\eta - \Lambda + \Lambda K})$  and hence,

$$\begin{aligned} \frac{(\eta + 2\Lambda K + \Lambda)\theta}{\Lambda(1+K) - (\eta + \Lambda K)\theta^2} &> \frac{K(\eta + 2\Lambda K + \Lambda)}{(1+K)\eta + \Lambda K} \\ &\geq \frac{2\Lambda}{[\Lambda^2 + \eta^2]K - (\eta - \Lambda)^2} - \frac{1}{K} + 1 \\ &> \frac{-\eta\theta^{K+1}\ln(\theta)}{\Lambda K(1-\theta)} + 1 - \frac{1}{K}, \end{aligned}$$

where the last inequality holds as  $\theta^K < (\frac{\Lambda K}{\eta - \Lambda + \Lambda K})^K \leq \frac{2\Lambda^2 K}{[\Lambda^2 + \eta^2]K - (\eta - \Lambda)^2}$  and  $-\frac{\ln(\theta)}{1-\theta} \leq \frac{1}{\theta}$ . Thus, (EC.6) holds and hence,  $W_q(\Lambda|\frac{\eta}{K}, K)$  is increasing in  $K$ .  $\square$

*Proof of Proposition 5* Denote the throughput rate as  $\lambda^*(z|\mu, K, \underline{b}) = p^*(z|\mu, K, \underline{b})\Lambda$ . Suppose that  $(z, \mu, K, \underline{b})$  is an optimal solution. Note that

$$\begin{aligned} \lambda^*(z|\mu, K, \underline{b}) &\leq \lambda^* \left( z \left| \mu, K, \frac{1}{1-\delta} \left[ R(\delta, 0) - c \left( W_q(\Lambda|\mu, K) + \frac{z}{\mu} \right) \right]^+ \right) = \min \left\{ W_q^{-1} \left( c^{-1}(R(\delta, 0)) - \frac{z}{\mu} \right) \left| \mu, K \right), \Lambda \right\} \\ &\leq \lambda^* \left( z \left| \frac{\eta}{K}, K, \frac{1}{1-\delta} \left[ R(\delta, 0) - c \left( W_q \left( \Lambda \left| \frac{\eta}{K}, K \right) + \frac{zK}{\eta} \right) \right]^+ \right) \right) \\ &\leq \lambda^* \left( z \left| \frac{\eta}{K_m}, K_m, \frac{1}{1-\delta} \left[ R(\delta, 0) - c \left( W_q(\Lambda|\mu, K) + \frac{zK_m}{\eta} \right) \right]^+ \right) = \lambda^* \left( z \left| \frac{\eta}{K_m}, K_m, 0 \right) \right) \quad (\text{EC.7}) \\ &\leq \lambda^*(z|\mu, K, \underline{b}), \end{aligned}$$

where the first inequality follows as  $\lambda^*$  is maximized at  $\underline{b} = \frac{1}{1-\delta} \left[ R(\delta, 0) - c \left( W_q(\Lambda|\mu, K) + \frac{z}{\mu} \right) \right]^+$  for given  $(\mu, K, z)$  by (5), the second inequality follows as  $W_q(\Lambda|\mu, K)$  is decreasing in  $\mu$  for a given  $(\lambda, K)$ , the third inequality follows as  $W_q(\Lambda|\frac{\eta}{K}, K)$  is increasing in  $K$  for a given  $\lambda$ , shown in the proof of Lemma 2, and the last inequality follows from the optimality of  $(z, \mu, K, \underline{b})$ . Thus,  $\lambda^*(z|\mu, K, \underline{b}) = \lambda^* \left( z \left| \frac{\eta}{K_m}, K_m, \frac{1}{1-\delta} \left[ R(\delta, 0) - c \left( W_q \left( \Lambda \left| \frac{\eta}{K_m}, K_m \right) + \frac{zK_m}{\eta} \right) \right]^+ \right) = \lambda^* \left( z \left| \frac{\eta}{K_m}, K_m, 0 \right) \right)$ , implying that either  $(\mu, K, \underline{b}) = (\frac{\eta}{K_m}, K_m, 0)$  or  $\lambda^*(z|\mu, K, \underline{b}) = \Lambda$ . Furthermore,

since  $\beta^* \left( z \left| \tilde{\mu}, \tilde{K}, \tilde{\underline{b}} \right. \right)$  is minimized at  $(\tilde{\mu}, \tilde{K}, \tilde{\underline{b}}) = \left( \frac{\eta}{K_m}, K_m, 0 \right)$  when  $\lambda^* \left( z \left| \tilde{\mu}, \tilde{K}, \tilde{\underline{b}} \right. \right) = \Lambda$  by (9),  $\beta^* \left( z \left| \frac{\eta}{K_m}, K_m, 0 \right. \right) \leq \beta^* (z | \mu, K, \underline{b})$  and hence,  $\underline{\gamma} \left( \beta^* \left( z \left| \frac{\eta}{K_m}, K_m, 0 \right. \right), z \right) \geq \underline{\gamma} (\beta^* (z | \mu, K, \underline{b}), z) = \delta$  and the throughput optimization problem can be reduced to the one that determines the confirmation latency  $z$  as

$$\max_z \lambda^* \left( z \left| \frac{\eta}{K_m}, K_m, 0 \right. \right) \quad (\text{EC.8})$$

$$\text{s.t. } \underline{\gamma} \left( \beta^* \left( z \left| \frac{\eta}{K_m}, K_m, \frac{1}{1-\delta} \left[ R(\delta, 0) - c \left( W_q \left( \Lambda \left| \frac{\eta}{K_m}, K_m \right. \right) + \frac{zK_m}{\eta} \right] \right)^+ \right), z \right) \leq \delta, \quad (\text{EC.9})$$

$$\underline{\gamma} \left( \beta^* \left( z \left| \frac{\eta}{K_m}, K_m, 0 \right. \right), z \right) \geq \delta. \quad (\text{EC.10})$$

Since the left-hand sides of both (EC.9) and (EC.10) are quasi-convex by the proof of Lemma 2 and Proposition 3, respectively, if the feasible region defined by (EC.9) and (EC.10) is non-empty, there exist  $\underline{z} = z_\lambda$  and  $\bar{z} \geq z_\lambda$  such that (EC.9) is binding and the structure of optimal solutions can be summarized as follows.

1. If  $R(\delta, 0) < c \left( W_q \left( \Lambda \left| \frac{\eta}{K_m}, K_m \right. \right) + \frac{z_\lambda K_m}{\eta} \right)$ ,  $(z, \mu, K, \underline{b}) = \left( z_\lambda, \frac{\eta}{K_m}, K_m, 0 \right)$  is the unique optimal solution and the optimal  $\lambda^* \left( z_\lambda \left| \frac{\eta}{K_m}, K_m, 0 \right. \right) < \Lambda$ .

2. Otherwise, the optimal solution is not unique and the optimal throughput  $\lambda^* (z | \mu, K, \underline{b}) = \Lambda$ .

$$\text{Let } z_R = \frac{\eta}{K_m} \left[ c^{-1} (R(\delta, 0)) - W_q \left( \Lambda \left| \frac{\eta}{K_m}, K_m \right. \right) \right].$$

- (a) If there exist  $\underline{z}'$  and  $\bar{z}'$ ,  $\underline{z}' \leq \bar{z}'$ , such that (EC.10) is binding, then the set of optimal  $z$  is

$$[z_\lambda, \min \{z_R, \underline{z}'\}].$$

- (b) Otherwise, the set of optimal  $z$  is  $[z_\lambda, \min \{z_R, \bar{z}\}]$ .

Thus, Proposition 5 holds.  $\square$

*Proof of Proposition 6* Suppose that  $(z, \mu, K, \underline{b})$  is an optimal solution. Then,

$$\underline{\gamma} \left( \beta^* \left( z \left| \frac{\eta}{K_m}, K_m, \frac{1}{1-\delta} \left[ R(\delta, 0) - c \left( W_q \left( \Lambda \left| \frac{\eta}{K_m}, K_m \right. \right) + \frac{zK_m}{\eta} \right] \right)^+ \right), z \right) \leq \delta \leq \underline{\gamma} \left( \beta^* \left( z \left| \frac{\eta}{K_m}, K_m, 0 \right. \right), z \right)$$

by the proof of Proposition 5, and hence, there exists  $\underline{b}^*(z) \in \left[ 0, \frac{1}{1-\delta} \left[ R(\delta, 0) - c \left( W_q \left( \Lambda \left| \frac{\eta}{K_m}, K_m \right. \right) + \frac{zK_m}{\eta} \right) \right]^+ \right]$  such that  $\underline{\gamma} \left( z \left| \frac{\eta}{K_m}, K_m, \underline{b}^*(z) \right. \right) = \delta$  and  $\Phi^*(z | \mu, K, \underline{b}) = \Phi^* \left( z \left| \frac{\eta}{K_m}, K_m, \underline{b}^*(z) \right. \right)$ . Furthermore, users' expected total utility

$$\begin{aligned} U^*(z | \mu, K, \underline{b}) &= \Lambda R(\delta, 0) - \Phi^*(z | \mu, K, \underline{b}) - \int_0^\Lambda c \left( W_q(\lambda | \mu, K) + \frac{z}{\mu} \right) d\lambda \\ &\leq \Lambda R(\delta, 0) - \Phi^* \left( z \left| \frac{\eta}{K_m}, K_m, \underline{b}^*(z) \right. \right) - \int_0^\Lambda c \left( W_q \left( \lambda \left| \frac{\eta}{K_m}, K_m \right. \right) + \frac{K_m}{\eta} \right) d\lambda \\ &= U^* \left( z \left| \frac{\eta}{K_m}, K_m, \underline{b}^*(z) \right. \right). \end{aligned}$$

Thus, we must have  $(\mu, K) = \left( \frac{\eta}{K_m}, K_m \right)$  and the problem to optimize users' total utility can be reduced to  $\max_{z \in [z_\lambda, \min \{z_R, \underline{z}'\}]} \left\{ U^* \left( z \left| \frac{\eta}{K_m}, K_m, \underline{b}^*(z) \right. \right) \right\}$  if (EC.10) can be binding and to

$\max_{z \in [z_\lambda, \min\{z_R, \bar{z}_\lambda\}]} \left\{ U^* \left( z \left| \frac{\eta}{K_m}, K_m, \underline{b}^*(z) \right. \right) \right\}$  otherwise. Furthermore, by equations (9) at  $p^*(z) = 1$  and (2),  $U^* \left( z \left| \frac{\eta}{K_m}, K_m, \underline{b}^*(z) \right. \right)$  can be written as a function of  $\beta^* = \alpha\Phi^*$  as

$$U^*(\beta^*) = \Lambda R(\delta, 0) - \frac{\beta^*}{\alpha} - \int_0^\Lambda c \left( W_q \left( \tilde{\lambda} \left| \frac{\eta}{K_m}, K_m \right. \right) + \frac{\ln(2\delta)}{\frac{\eta}{K_m} \left[ 1 - \frac{1}{\beta^*} - \ln(\beta^*) \right]} \right) d\tilde{\lambda}. \quad (\text{EC.11})$$

Note that

$$\frac{dU^*(\beta^*)}{d\beta^*} = -\frac{1}{\alpha} + \frac{\ln(2\delta)}{\frac{\eta}{K_m}} \frac{\left( \frac{1}{\beta^*} \right)^2 - \frac{1}{\beta^*}}{\left[ 1 - \frac{1}{\beta^*} - \ln(\beta^*) \right]^2} \cdot \int_0^\Lambda c' \left( W_q \left( \lambda \left| \frac{\eta}{K_m}, 1 \right. \right) + \frac{\ln(2\delta)}{\frac{\eta}{K_m} \left[ 1 - \frac{1}{\beta^*} - \ln(\beta^*) \right]} \right) d\lambda,$$

which decreases from  $\infty$  to  $-\frac{1}{\alpha}$  as  $\beta^*$  increases from 1 to  $\infty$ , i.e., there exists a unique maximizer  $\hat{\beta}^*$ . Furthermore, since  $U^* \left( \beta^* \left( z_\lambda \left| \frac{\eta}{K_m}, K_m, 0 \right. \right) \right) = 0$ ,  $\frac{dU^*(\beta^*)}{d\beta^*} \Big|_{\beta^* = \beta^*(z_\lambda | \frac{\eta}{K_m}, K_m, 0)} \leq 0$  and hence  $z^*(\hat{\beta}^*) \geq z_\lambda$ . Thus, there is a unique optimal  $z = \min \left\{ z_R, \underline{z}', z^*(\hat{\beta}^*) \right\}$  if (EC.10) can be binding and  $z = \min \left\{ z_R, \bar{z}, z^*(\hat{\beta}^*) \right\}$  otherwise.  $\square$

#### EC.4. Proofs for Section 6

*Proof of Proposition 7* The constraints of the reduced optimization problem analogous to (EC.8)-(EC.10) can be written as

$$\underline{\gamma} \left( \alpha B_0 + \alpha\Phi^* \left( z \left| \frac{\eta}{K_m}, K_m, \frac{1}{1-\delta} \left[ R(\delta, 0) - c \left( W_q \left( \Lambda \left| \frac{\eta}{K_m}, K_m \right. \right) + \frac{zK_m}{\eta} \right] \right)^+ \right), z \right) \leq \delta, \quad (\text{EC.12})$$

$$\underline{\gamma} \left( \alpha B_0 + \alpha\Phi^* \left( z \left| \frac{\eta}{K_m}, K_m, 0 \right. \right), z \right) \geq \delta. \quad (\text{EC.13})$$

Proposition 7 can be established by the same procedures for solving the corresponding optimization problems under the basic model.  $\square$

*Proof of Proposition 8* Following a similar argument as that provided in the proof of Theorem 1, we can show that  $G^*$  is continuous for any given  $p^*$ . Next, we show that  $b$  increases in  $C$ . Suppose that  $c_1 < c_2$  but  $b_1 > b_2$ . As a result, it is more costly for users with  $c_1$  to bid at  $b_2$  than at  $b_1$ , i.e.,

$$(1-\delta)b_1 + c_1 W_q((1-G^*(b_1))p^*\Lambda) \leq (1-\delta)b_2 + c_1 W_q((1-G^*(b_2))p^*\Lambda)$$

or

$$W_q((1-G^*(b_2))p^*\Lambda) - W_q((1-G^*(b_1))p^*\Lambda) \geq \frac{(1-\delta)(b_1-b_2)}{c_1}.$$

Hence, it is more costly for users with  $c_2$  to bid at  $b_2$  than at  $b_1$  as

$$[(1-\delta)b_2 + c_2 W_q((1-G^*(b_2))p^*\Lambda)] - [(1-\delta)b_1 + c_2 W_q((1-G^*(b_1))p^*\Lambda)] \geq (1-\delta) \left[ b_2 - b_1 + \frac{c_2}{c_1} (b_1 - b_2) \right] > 0,$$

which contradicts with the definition of an equilibrium.

The monotonicity of  $b$  depending on  $C$  implies that users with a waiting cost  $C(qp^*)$  bid at  $b(q)$  in equilibrium, i.e.,  $b(q)$  is a minimizer of the total cost  $(1 - \delta)b + C(qp^*)W_q((1 - G^*(b))p^*\Lambda)$ . By the first-order optimality condition, we have:

$$(1 - \delta) \frac{db(q)}{dq} = C(qp^*) W'_q((1 - q)p^*\Lambda).$$

Solving the above differential equation with the boundary condition  $b(0) = \underline{b}$ , we obtain the desired result for  $b(q)$ .  $\square$

*Proof of Proposition 9* Again we can show that  $G^*$  is continuous for any given  $p^*$ . We first show that  $b$  increases in  $\delta$ . Suppose that  $\delta_1 > \delta_2$  but  $b_1 < b_2$ . Then, it is more costly for users with  $z_2$  to bid at  $b_1$  than at  $b_2$ , i.e.,

$$(1 - \delta_2)b_2 + cW_q((1 - G^*(b_2))p^*\Lambda) \leq (1 - \delta_2)b_1 + cW_q((1 - G^*(b_1))p^*\Lambda)$$

or

$$cW_q((1 - G^*(b_1))p^*\Lambda) - cW_q((1 - G^*(b_2))p^*\Lambda) \geq (1 - \delta_2)(b_2 - b_1).$$

Then,

$$\begin{aligned} & [(1 - \delta_1)b_1 + cW_q((1 - G^*(b_1))p^*\Lambda)] - [(1 - \delta_1)b_2 + cW_q((1 - G^*(b_1))p^*\Lambda)] \\ & > (1 - \delta_1)(b_1 - b_2) + (1 - \delta_2)(b_2 - b_1) = (\delta_1 - \delta_2)(b_2 - b_1) > 0, \end{aligned}$$

i.e., it is more costly for users with  $z_1$  to bid at  $b_1$  than at  $b_2$ , which contradicts with the definition of an equilibrium.

Suppose that all users join the system. The monotonicity of  $b$  depending on  $\delta$  implies that users with a security requirement  $\delta(q)$  bid at  $b(q)$  in equilibrium, i.e.,  $b(q)$  is a minimizer of the total cost  $(1 - \delta(q))b + c \left( W_q((1 - G^*(b))p^*\Lambda) + \frac{\ln[2\delta(q)]}{\mu[1 - \frac{1}{\beta} + \ln(\frac{1}{\beta})]} \right)$ . By the first-order optimality condition, we have:

$$(1 - \delta(q)) \frac{db(q)}{dq} = cW'_q((1 - q)p^*\Lambda).$$

Solving the above differential equation with the boundary condition  $b(0) = \underline{b}$ , we obtain the desired result for  $b(q)$ .  $\square$

*Proof of Lemma 3* Let  $N(t)$  be the difference in length between the longest chain and the fork after  $\mathcal{B}$  has survived for  $t$  amount of time after it is mined. Note that  $N(t)$  is a continuous time Markov Chain with transition rates  $q_{i,i+1} = \mu$  and  $q_{i,i-1} = \frac{\mu}{\beta}$  for all integer  $i$ . Let  $S_n$  be its embedded chain. Then, by Theorem 11 of Alm (2002), for any integer  $i \geq 0$ ,

$$\begin{aligned} P(\tau > t | N(0) = i) &= P(N(s) \geq 0, 0 \leq s \leq t | N(0) = i) \\ &= 1 - \frac{1}{\beta^{i+1}} + \sum_{k=0}^{\infty} e^{-\frac{(1+\beta)\mu t}{\beta}} \frac{[(1+\beta)\mu t]^k}{\beta^k k!} \sum_{n=k+1}^{\infty} \frac{i+1}{n} P(S_n = -1 | S_0 = i) \\ &= \sum_{n=0}^{\infty} \frac{(i+1)e^{-\frac{(1+\beta)\mu t}{\beta}}}{n} P(S_n = -1 | S_0 = i) \sum_{k=0}^{n-1} \frac{[(1+\beta)\mu t]^k}{\beta^k k!}, \end{aligned}$$

and  $P(\tau > t | N(0) = i) = 0$  for  $i < 0$ . Furthermore, since the fork starts to grow once the immediate predecessor of  $\mathcal{B}$  has been mined, we have  $P(N(0) = i) = \frac{\beta}{(\beta+1)^{2-i}}$  for  $i \leq 1$ . Thus,

$$\begin{aligned} P(\tau > t) &= P(\tau > t | N(0) = 1) \frac{\beta}{\beta+1} + P(\tau > t | N(0) = 0) \frac{\beta}{(\beta+1)^2} \\ &= \frac{\beta-1}{\beta} + \sum_{n=1}^{\infty} \binom{2n}{n-1} \left\{ \frac{2\beta^n e^{-\frac{(\beta+1)\mu t}{\beta}}}{2n(\beta+1)^{2n+1}} \sum_{k=0}^{2n-1} \frac{[(1+\beta)\mu t]^k}{\beta^k k!} \right\} \\ &\quad \frac{\beta-1}{(\beta+1)^2} + \sum_{n=1}^{\infty} \binom{2n-1}{n-1} \left\{ \frac{\beta^n e^{-\frac{(\beta+1)\mu t}{\beta}}}{(2n-1)(\beta+1)^{2n+1}} \sum_{k=0}^{2n-2} \frac{[(1+\beta)\mu t]^k}{\beta^k k!} \right\} \\ &= \frac{\beta-1}{\beta} + \frac{\beta-1}{(\beta+1)^2} + \sum_{n=1}^{\infty} \binom{n}{\lceil n/2 \rceil - 1} \left\{ \frac{(3 + (-1)^n) \beta^{\lceil n/2 \rceil} e^{-\frac{(\beta+1)\mu t}{\beta}}}{2n(\beta+1)^{2\lceil n/2 \rceil + 1}} \sum_{k=0}^{n-1} \frac{[(\beta+1)\mu t]^k}{\beta^k k!} \right\}. \end{aligned}$$

□

*Proof of Proposition 10* A system equilibrium is a solution  $(Z^*, \beta^*)$  to the two equations  $\beta^* = \alpha\Phi^*(Z^*)$  and  $Z^* = Z(\beta^*, \delta)$ , or equivalently,  $\ln(Z^{-1}(Z^*|\delta)) = \ln(\alpha\Phi^*(Z^*))$ . The assumption implies that  $[\ln(Z^{-1}(Z^*|\delta))] = \frac{1}{Z^{-1}(Z^*|\delta)Z'(Z^{-1}(Z^*|\delta))}$  is negative and increases in  $Z^*$ , i.e.,  $\ln(Z^{-1}(Z^*|\delta))$  is convex decreasing. By Proposition 2, there can be at most two solutions to  $\ln(Z^{-1}(z^*|\delta)) = \ln(\alpha\Phi^*(z^*))$ . □
